# Supplementary material for: Pan-Cancer Mutational and Transcriptional Analysis of the Integrator Complex
Source: MDPI journal article supplement (doi:10.3390/ijms18050936), 2017-04-29
Supplement: s1 [file s1]

### Principal Component Analysis BLCA

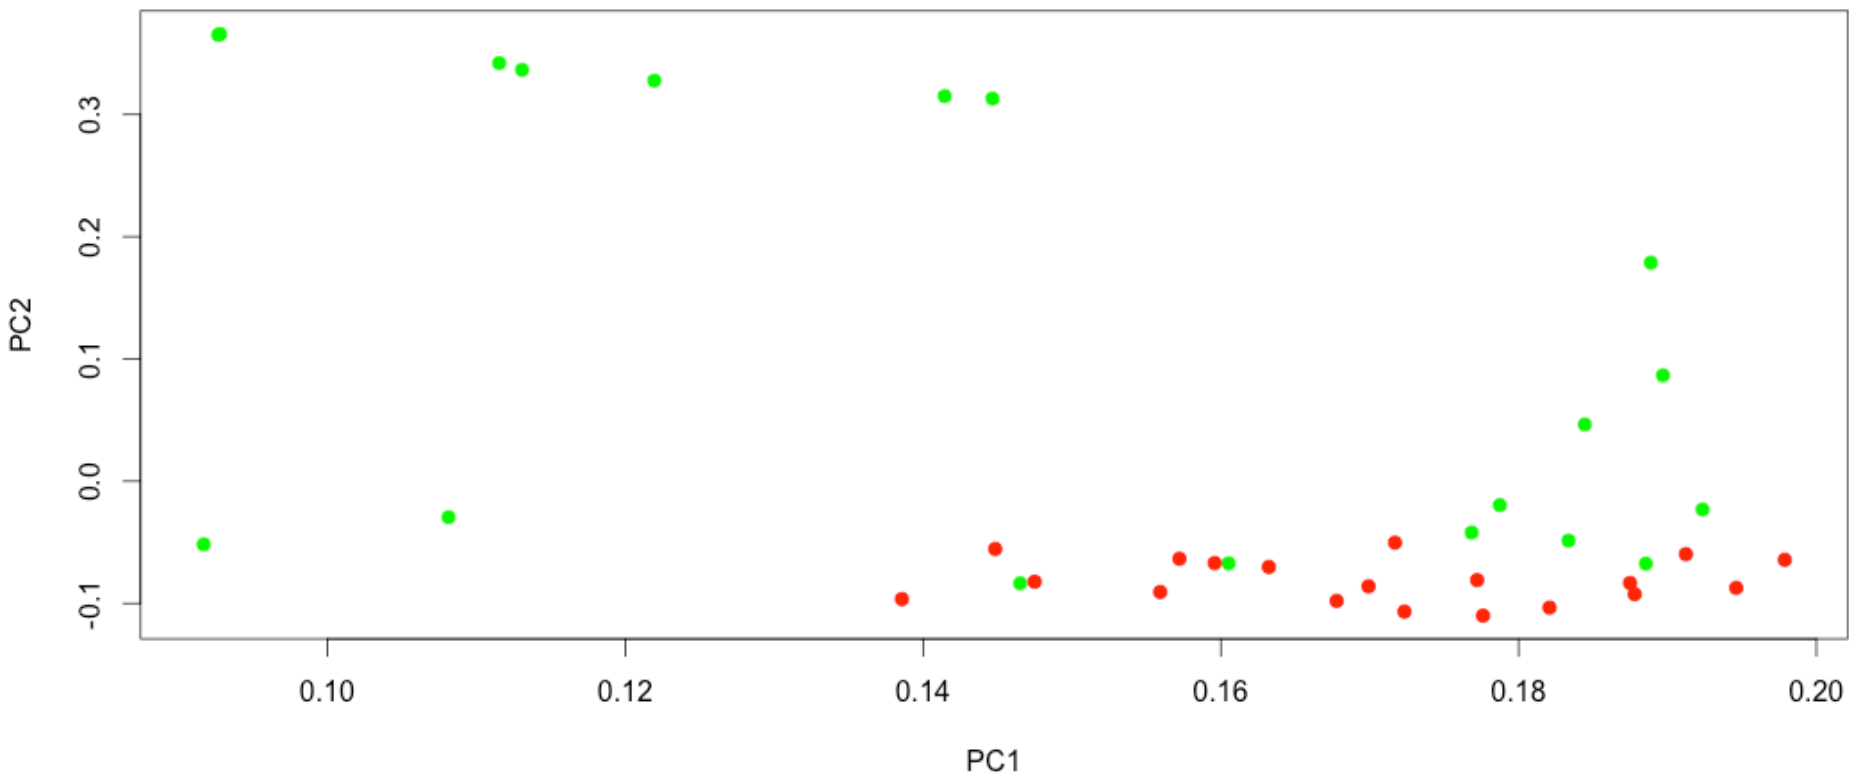

- Tumor sample
- Healthy counterpart

### Principal Component Analysis BRCA

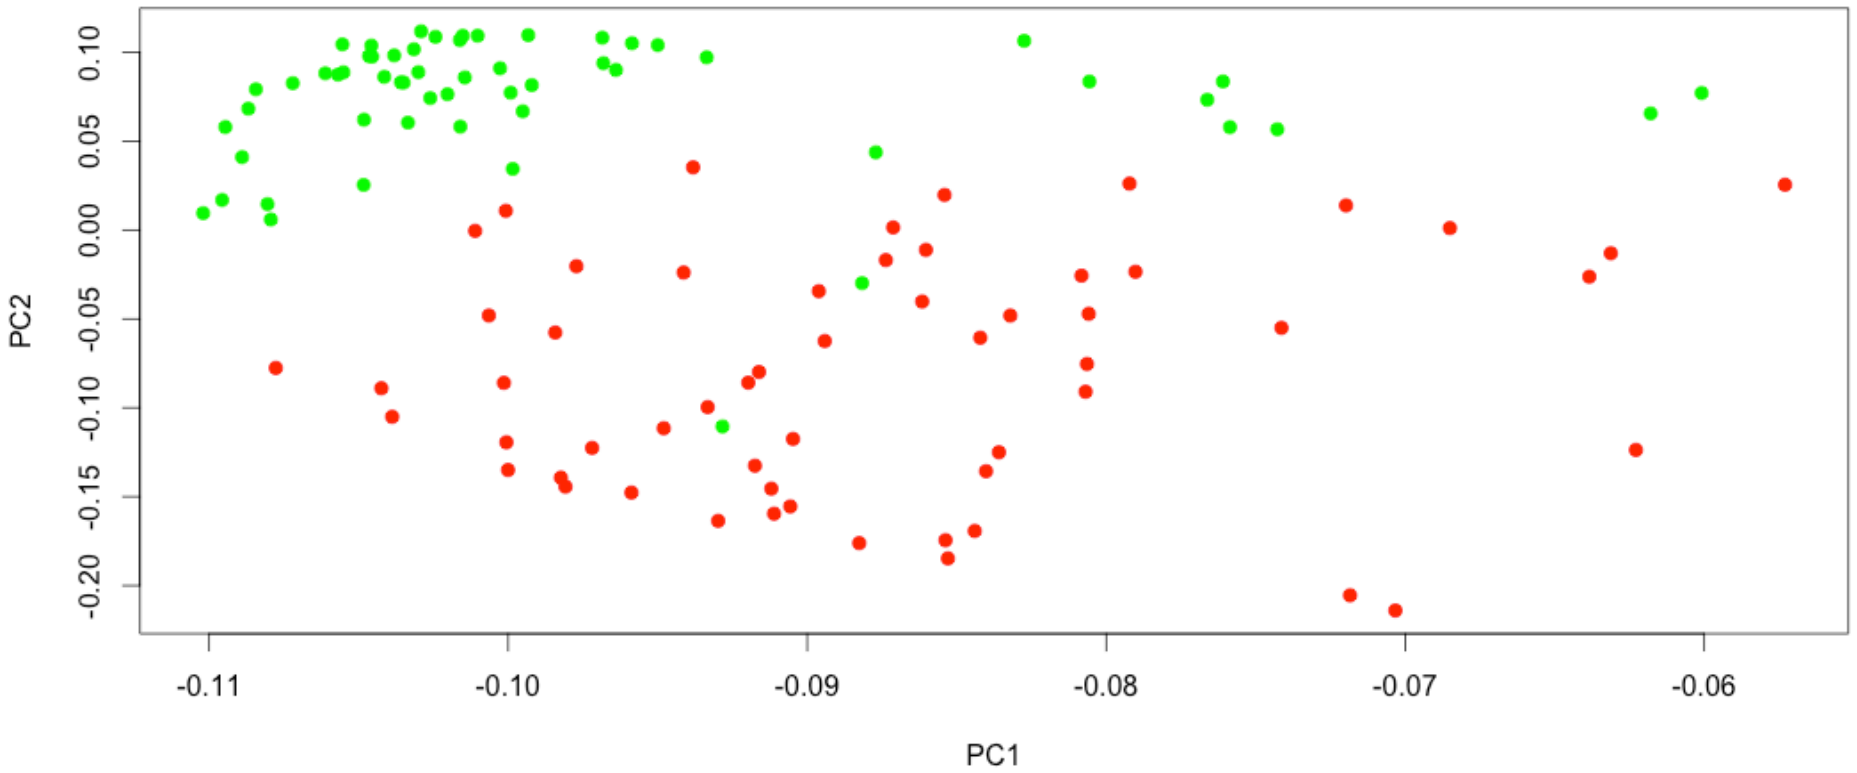

- Tumor sample
- Healthy counterpart

### Principal Component Analysis CESC

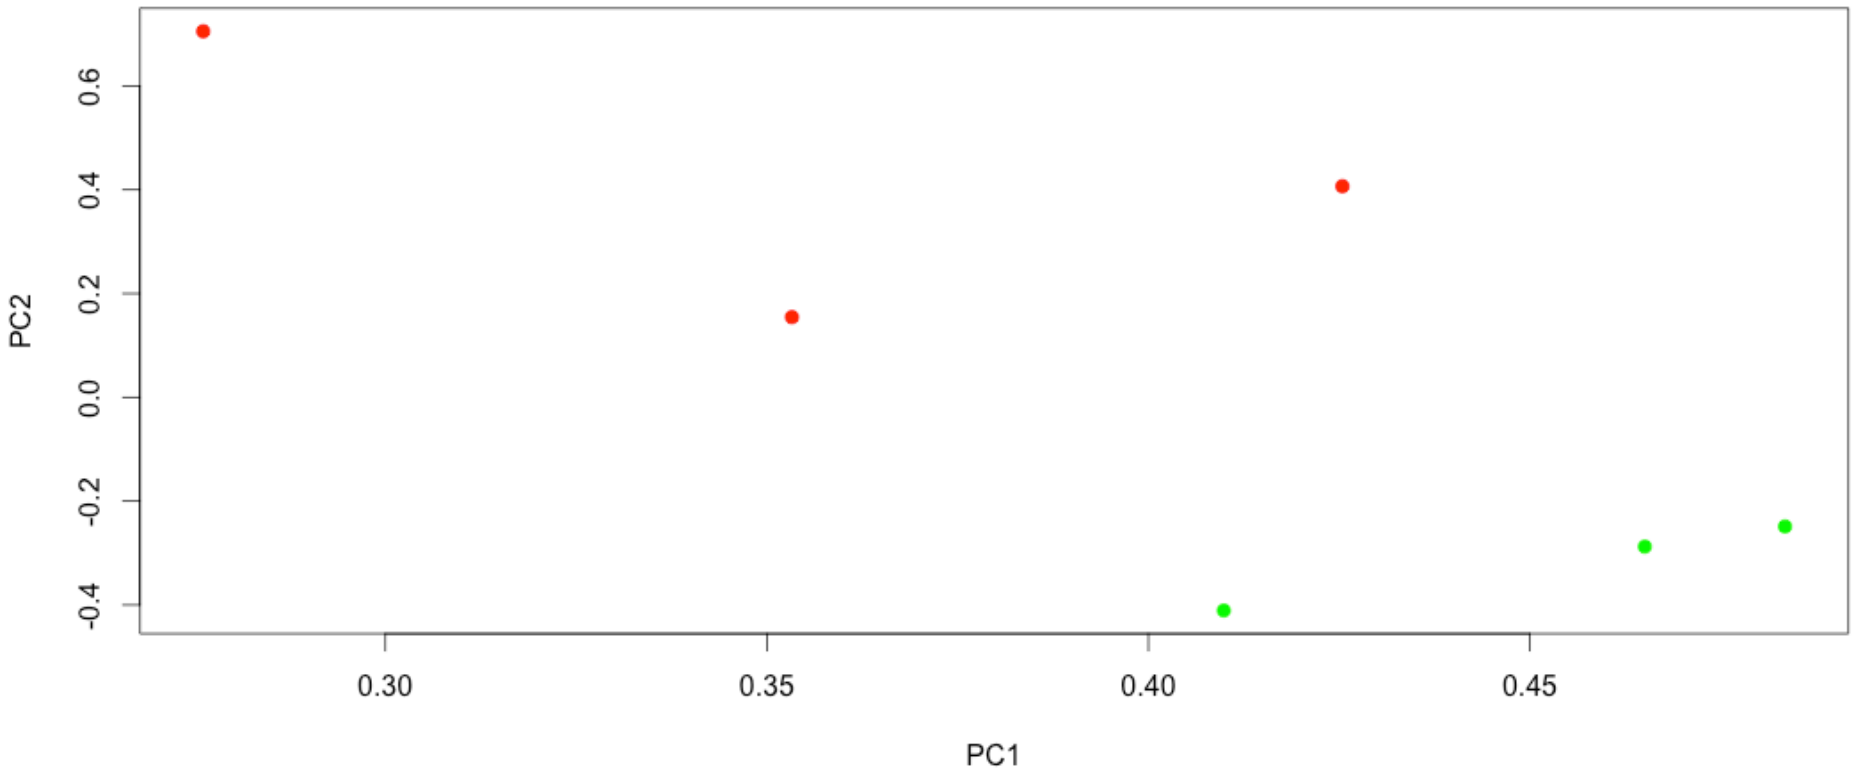

- Tumor sample
- Healthy counterpart

### Principal Component Analysis CHOL

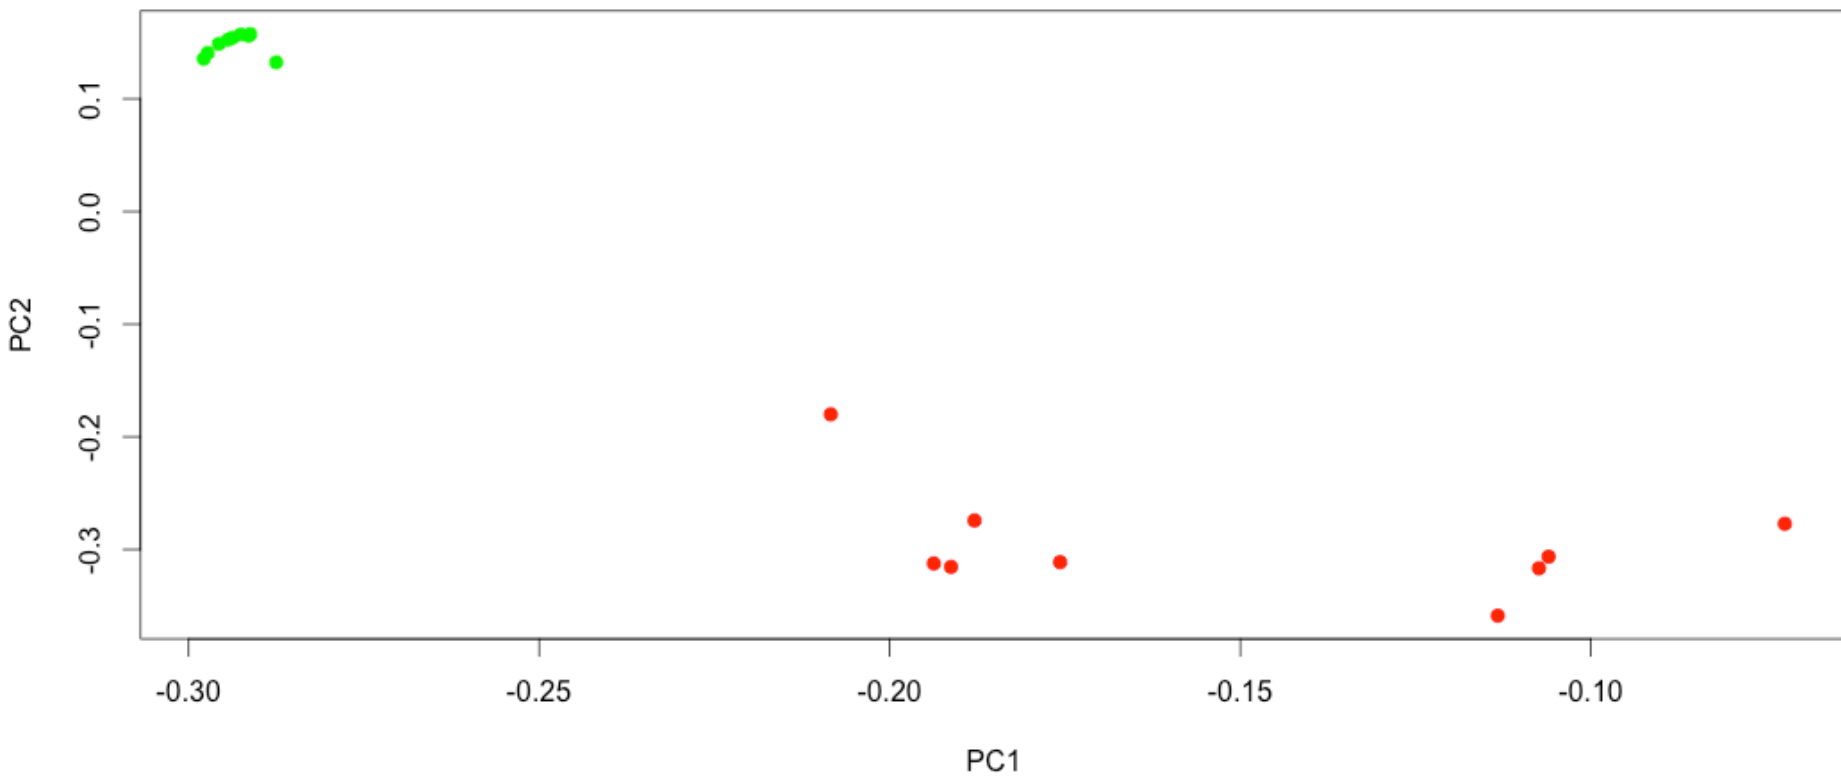

- Tumor sample
- Healthy counterpart

Principal Component Analysis COAD

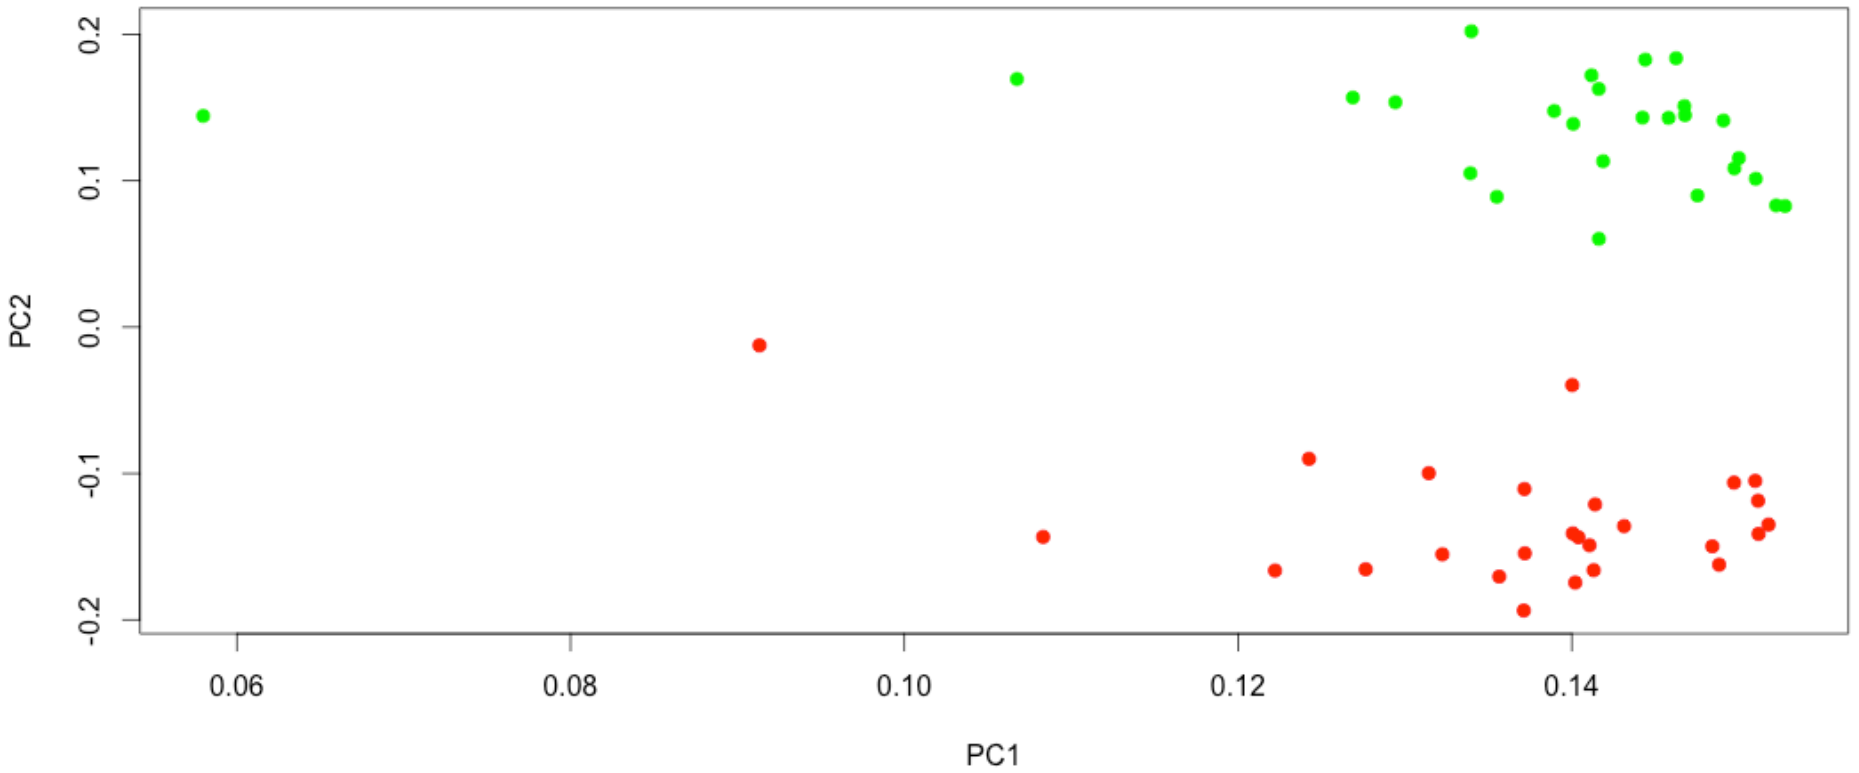

- Tumor sample
- Healthy counterpart

# Principal Component Analysis ESCA

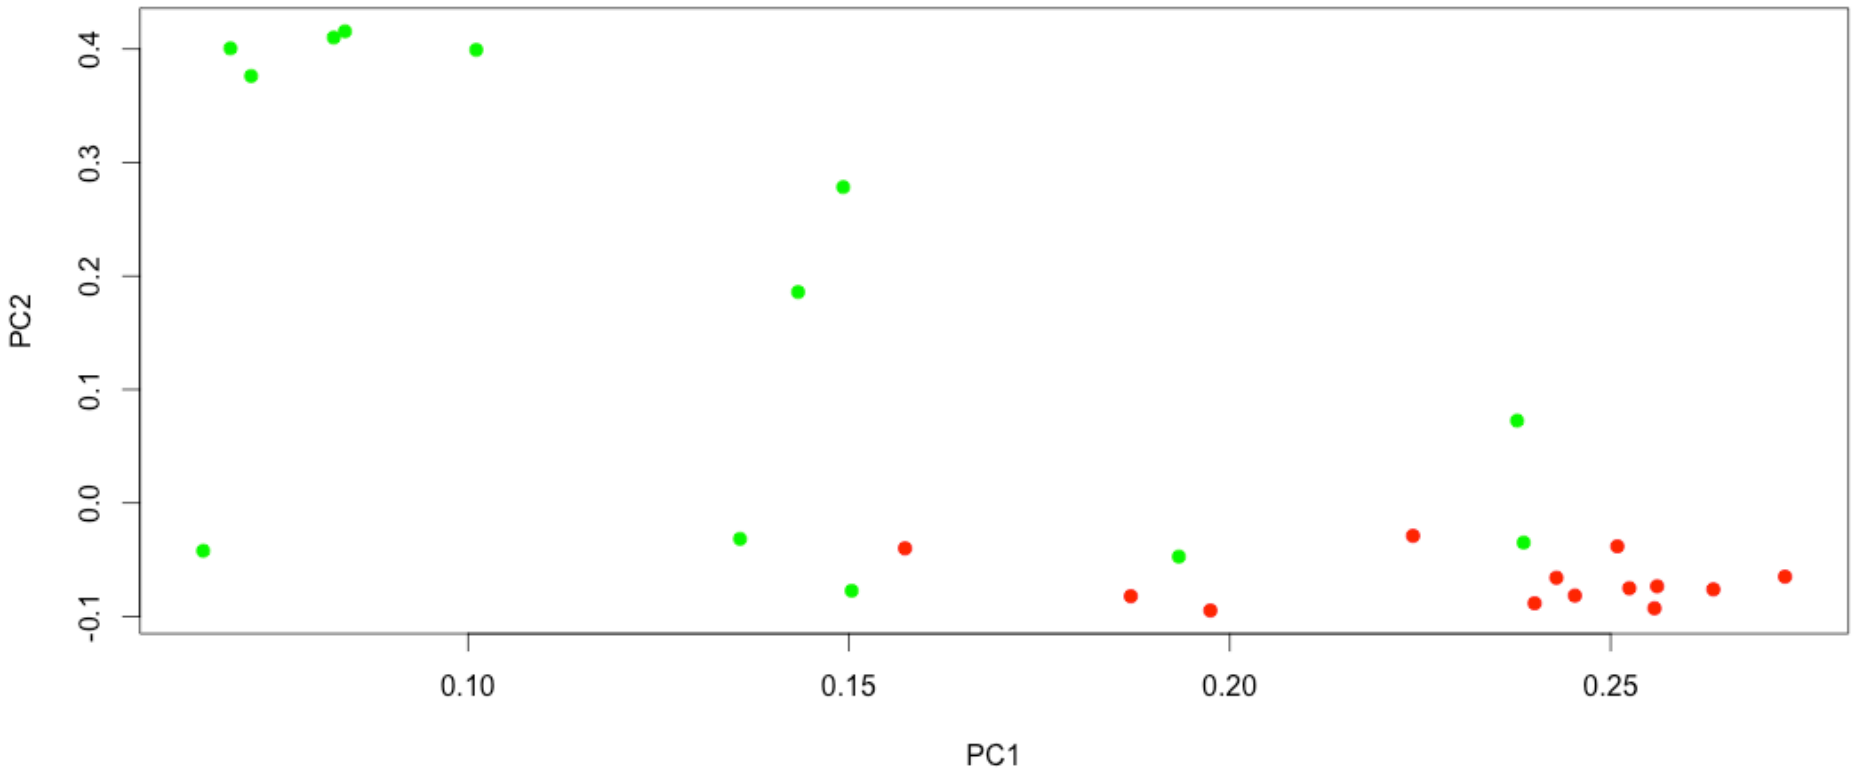

- Tumor sample
- Healthy counterpart

Principal Component Analysis HNSC

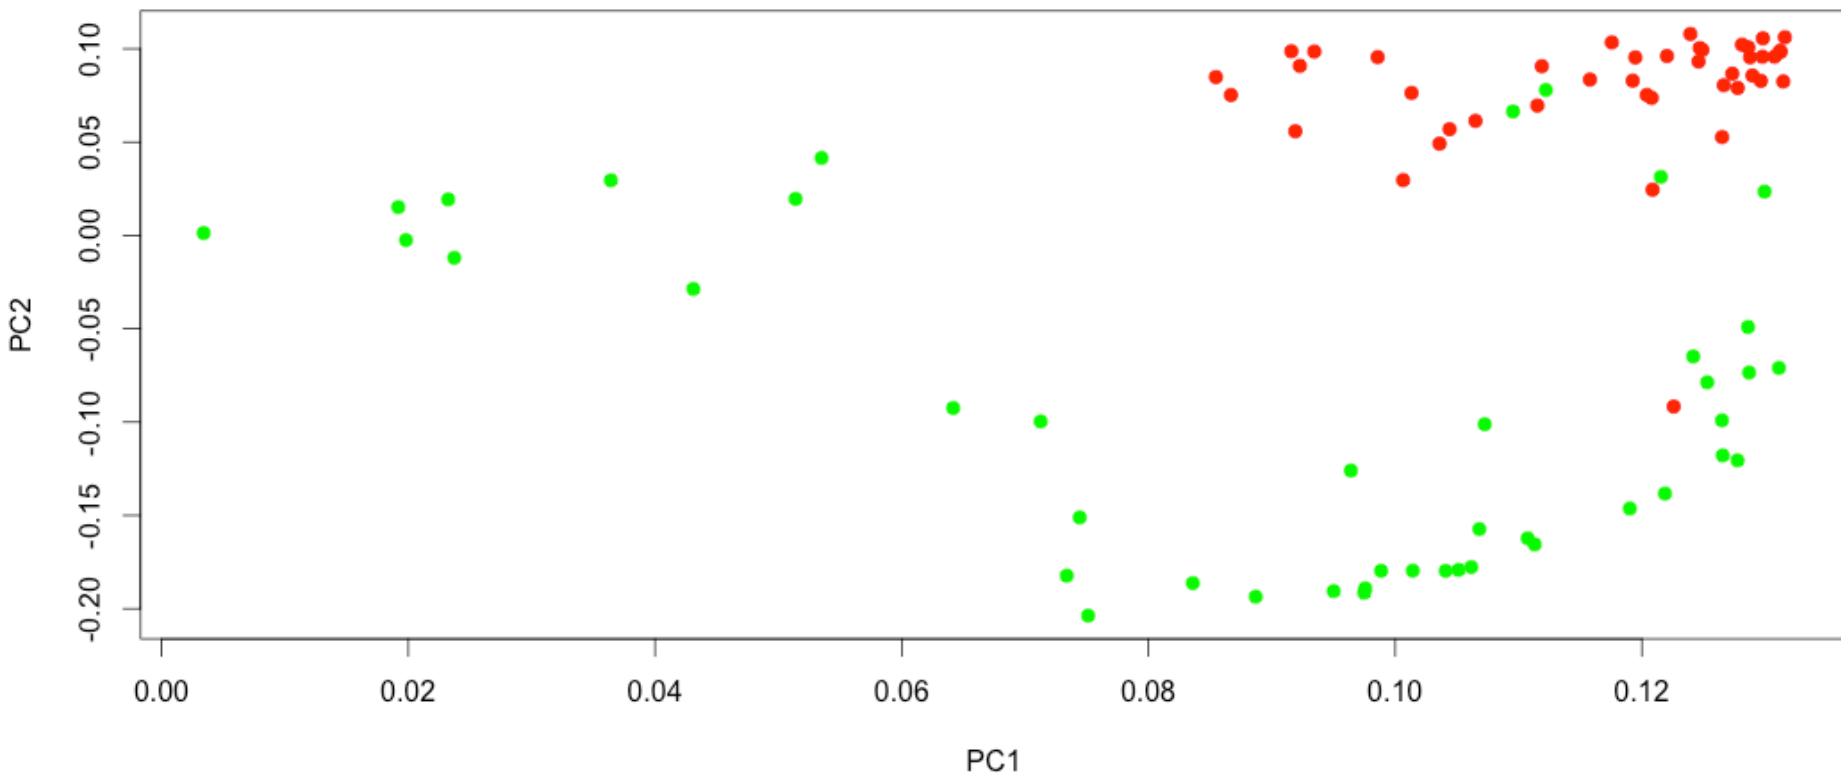

- Tumor sample
- Healthy counterpart

### Principal Component Analysis KICH

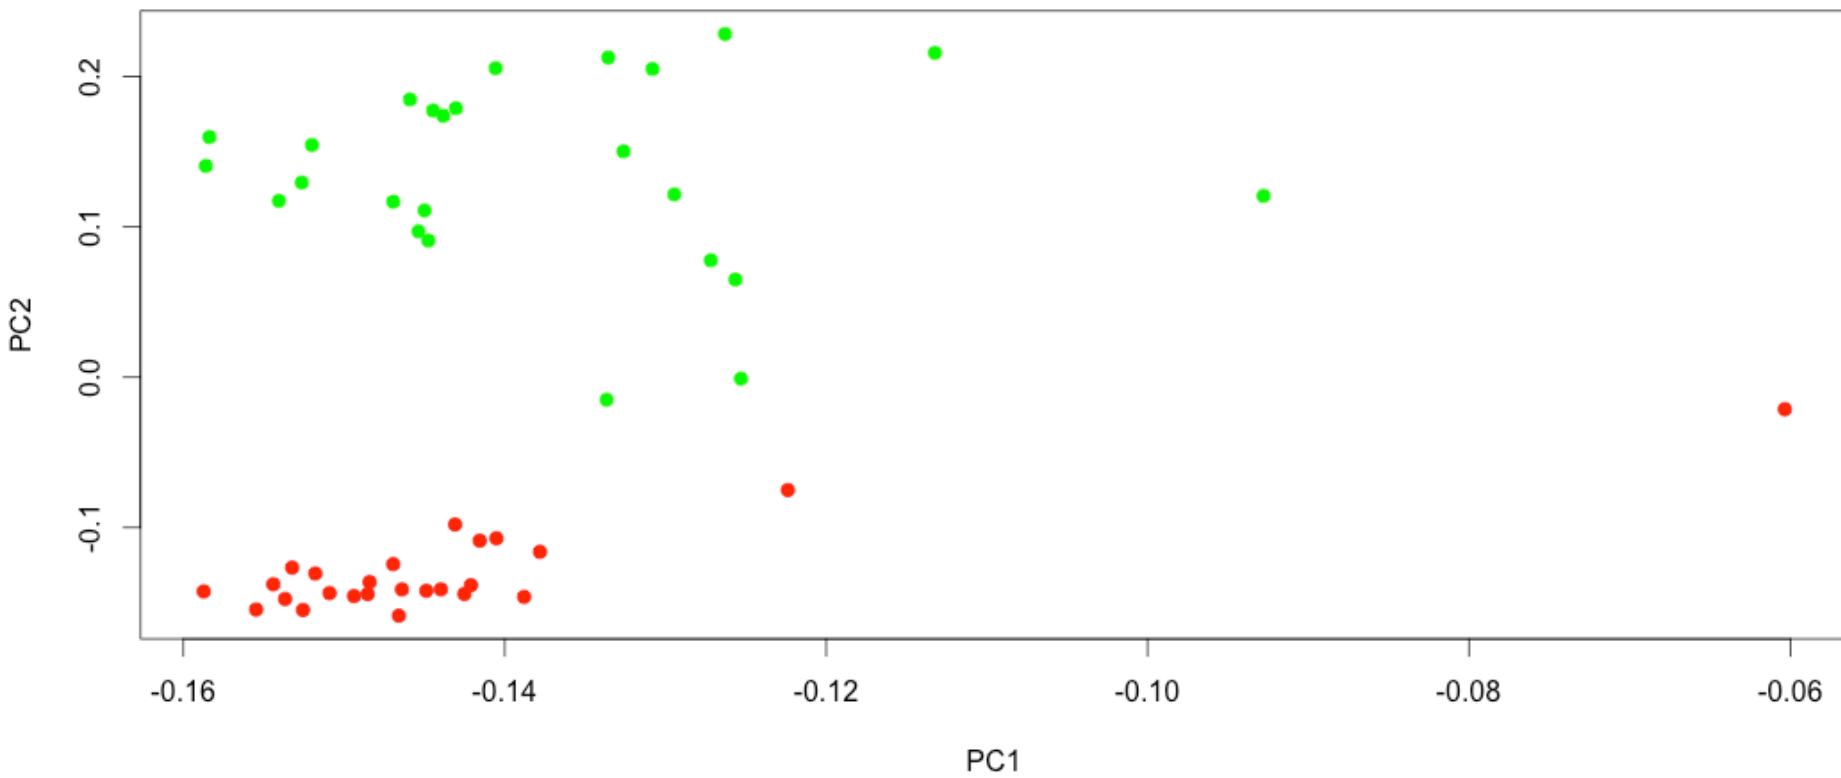

- Tumor sample
- Healthy counterpart



### Principal Component Analysis KIRC

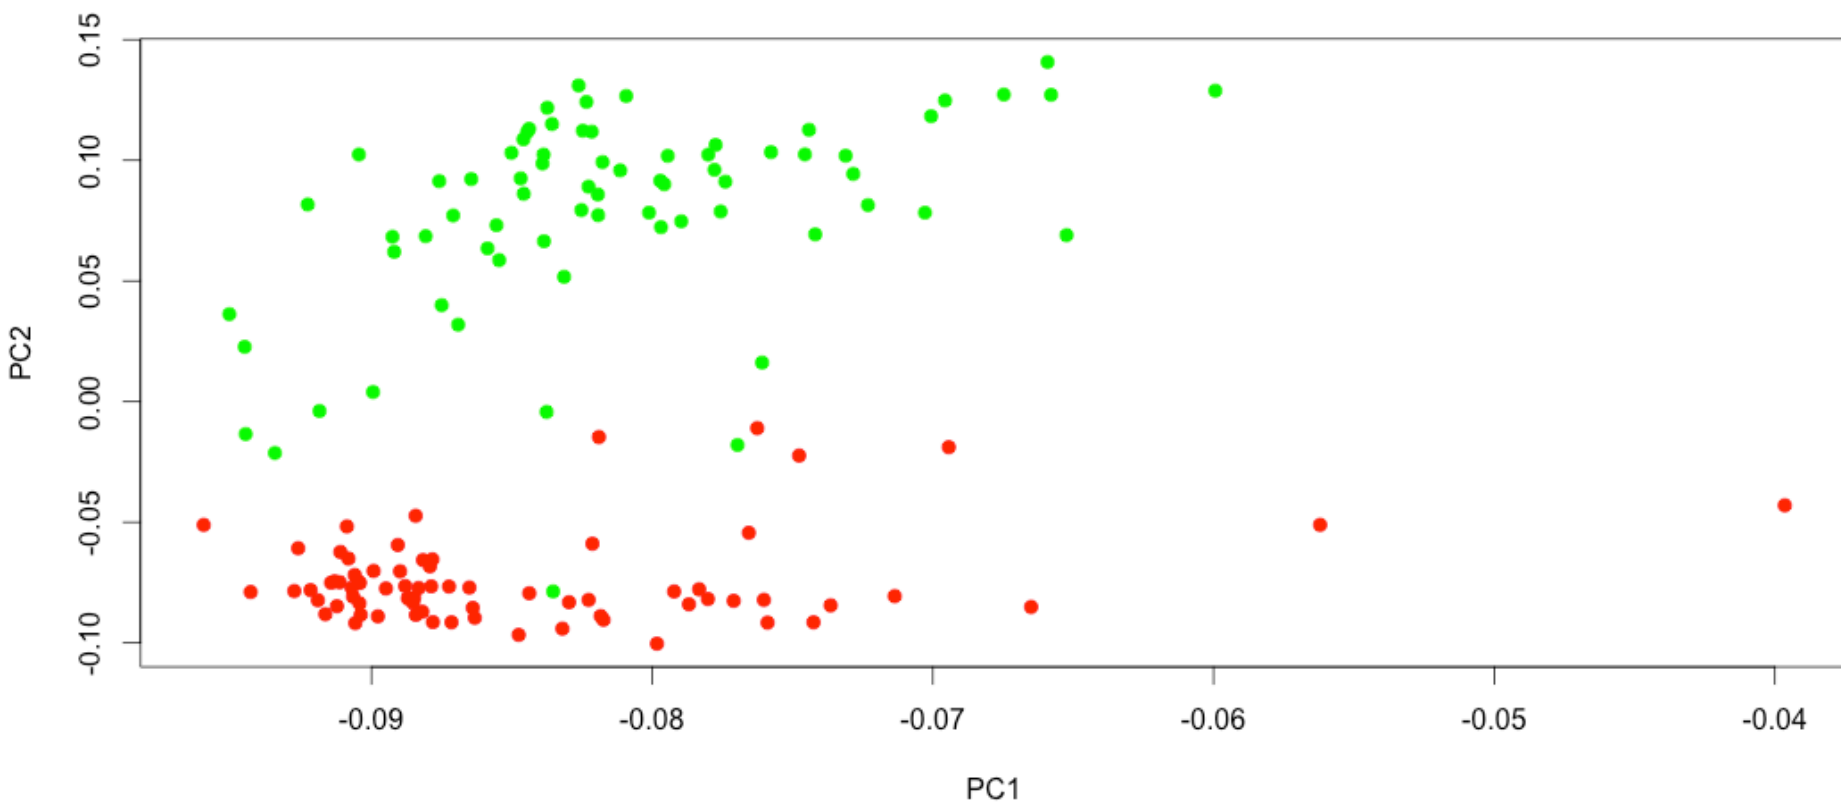

- Tumor sample
- Healthy counterpart

### Principal Component Analysis KIRP

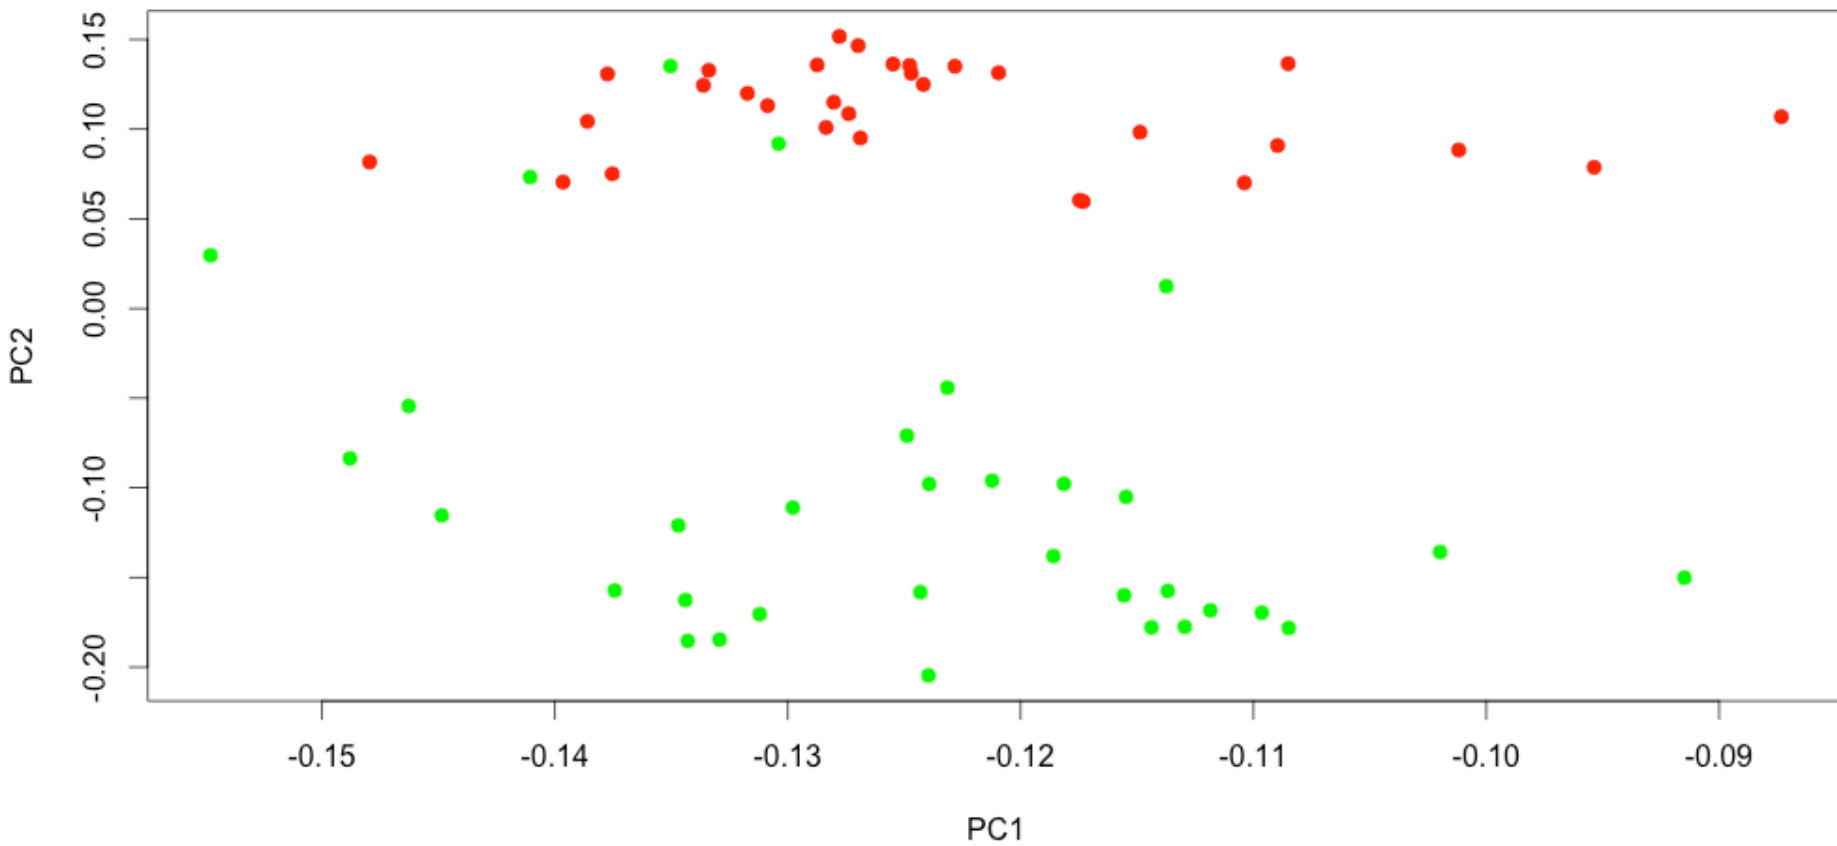

- Tumor sample
- Healthy counterpart

# Principal Component Analysis LIHC

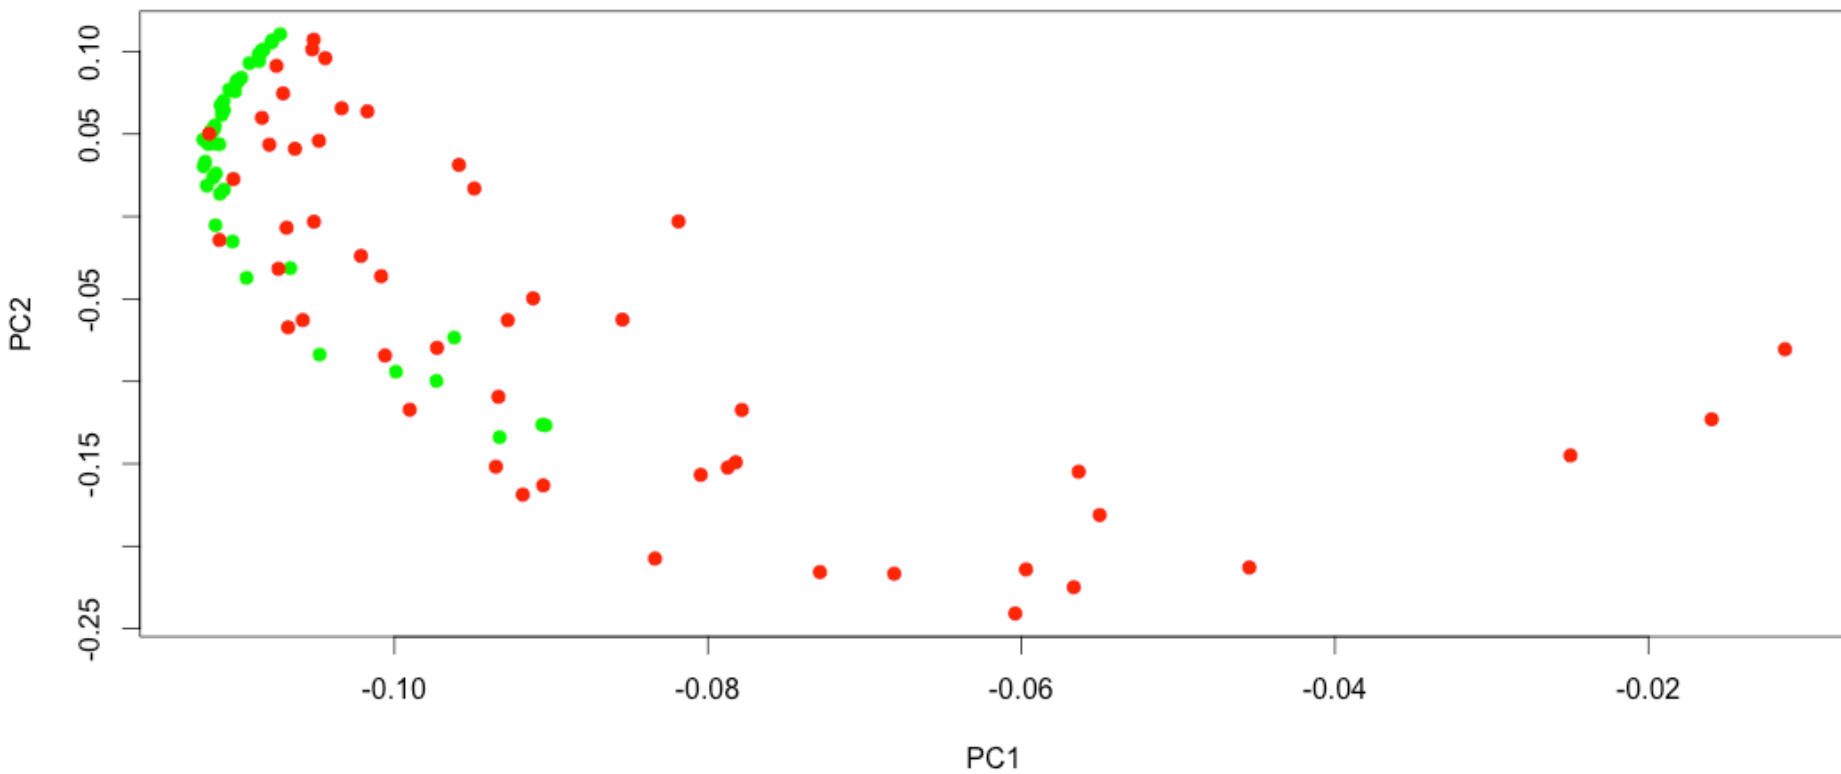

- Tumor sample
- Healthy counterpart

Principal Component Analysis LUAD

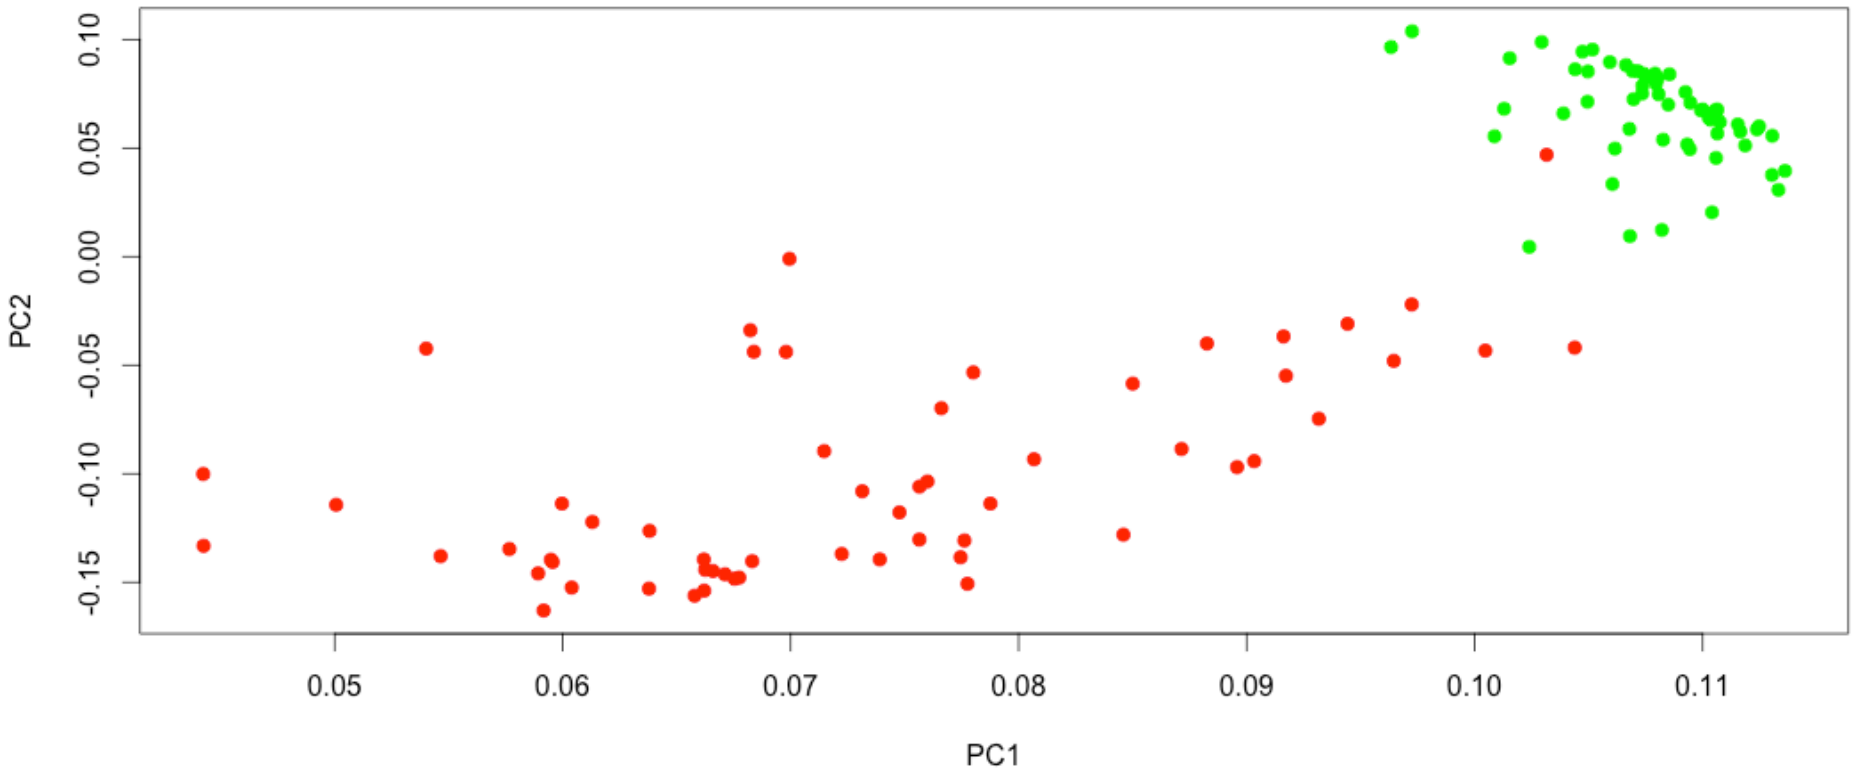

- Tumor sample
- Healthy counterpart

Principal Component Analysis LUSC

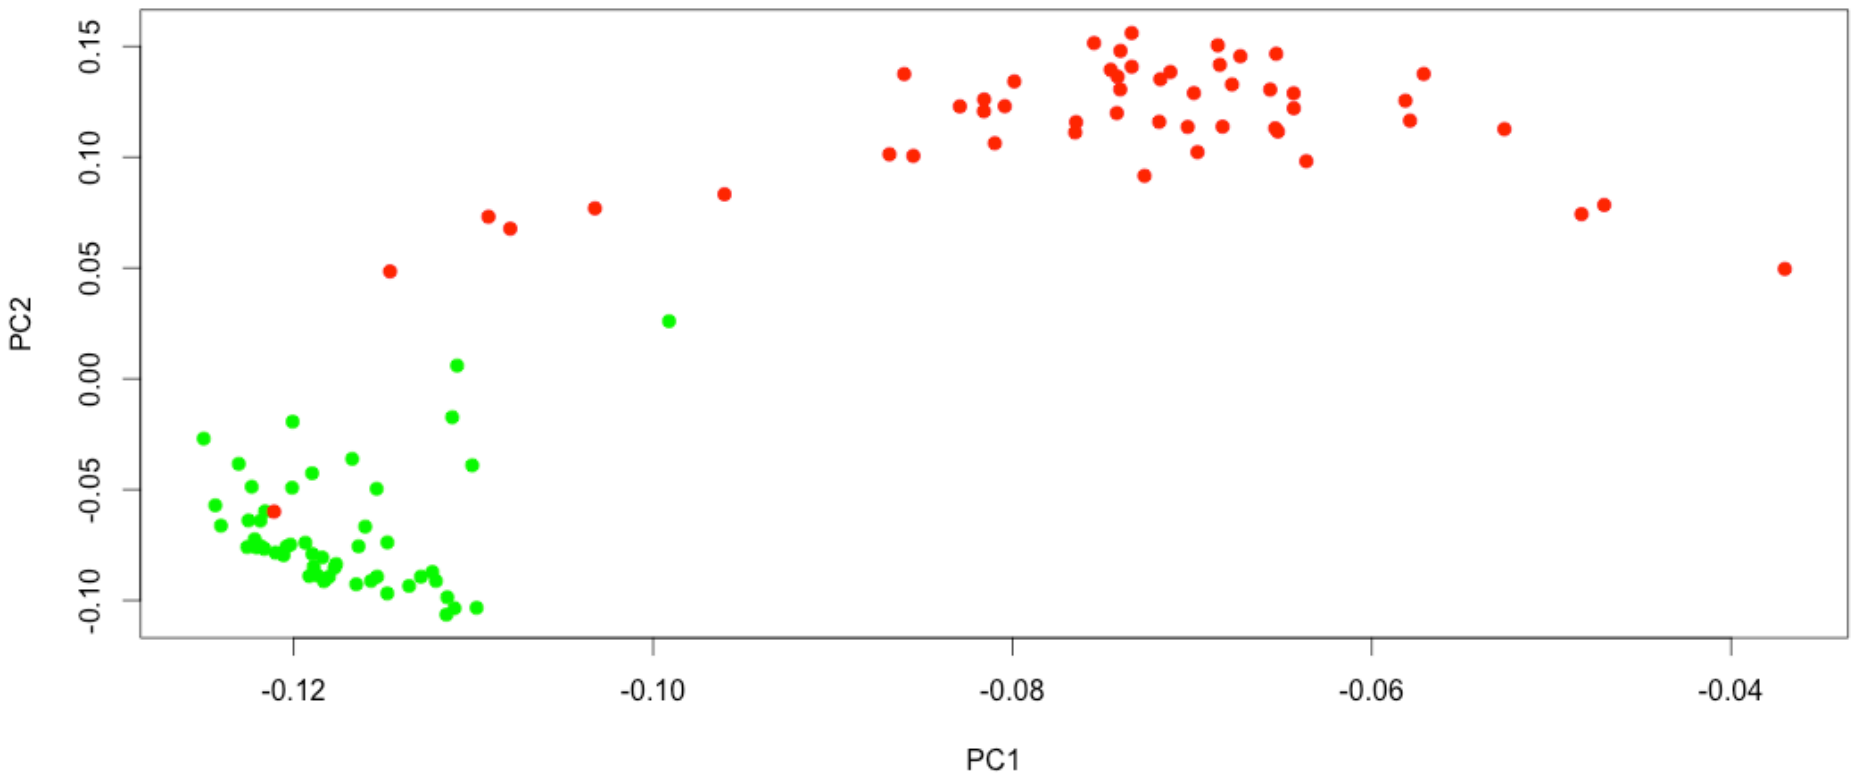

- Tumor sample
- Healthy counterpart

### Principal Component Analysis PAAD

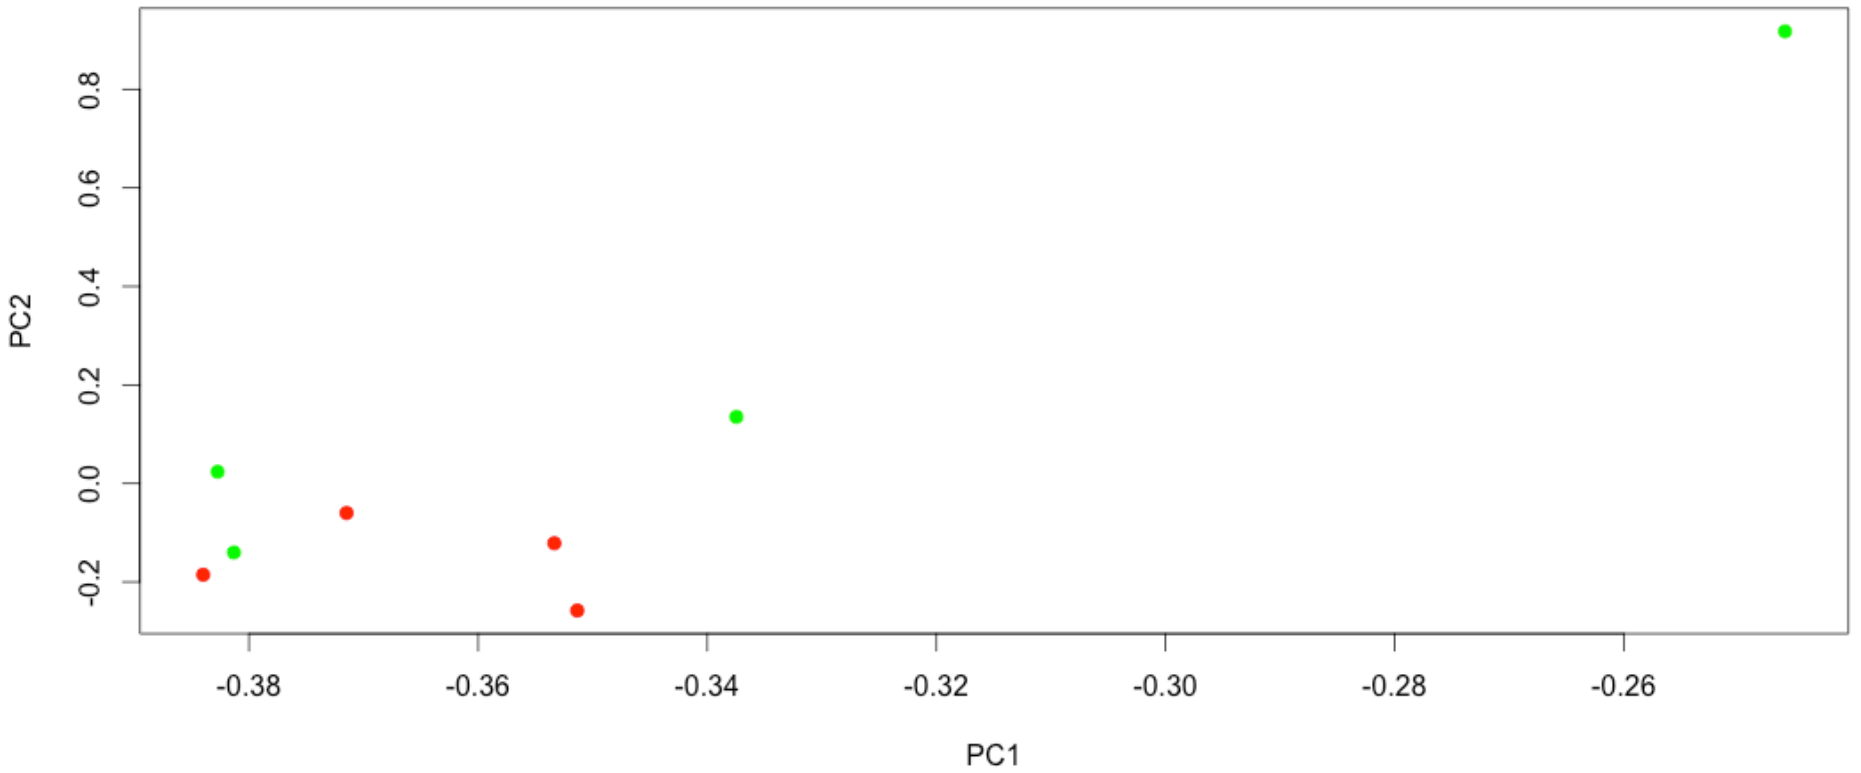

• Tumor sample

• Healthy counterpart

### Principal Component Analysis PCPG

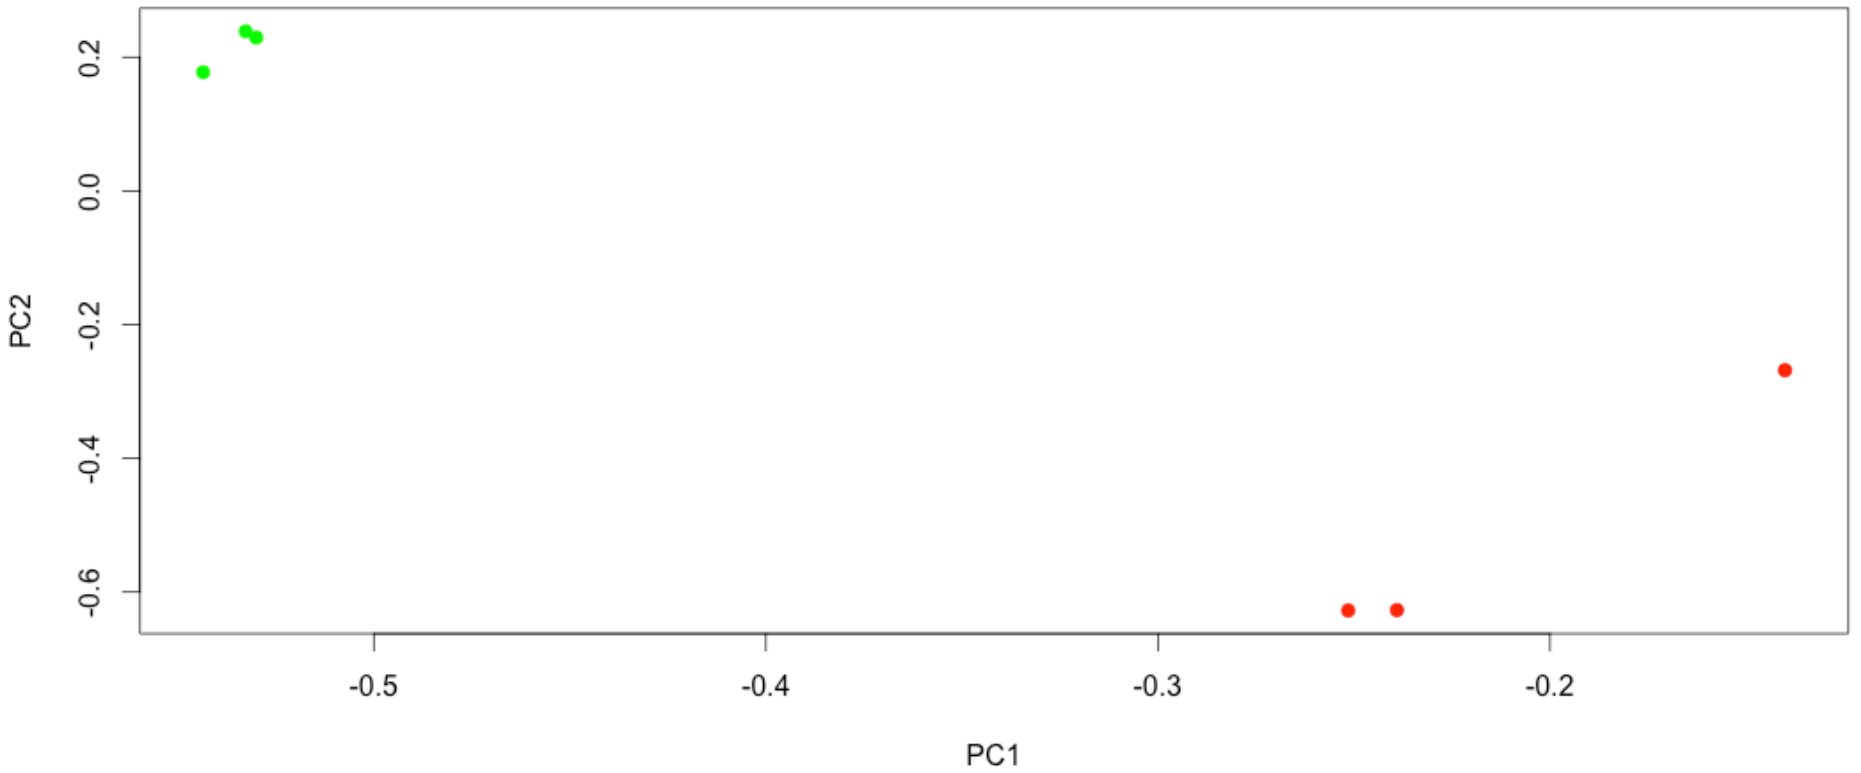

- Tumor sample
- Healthy counterpart

Principal Component Analysis PRAD

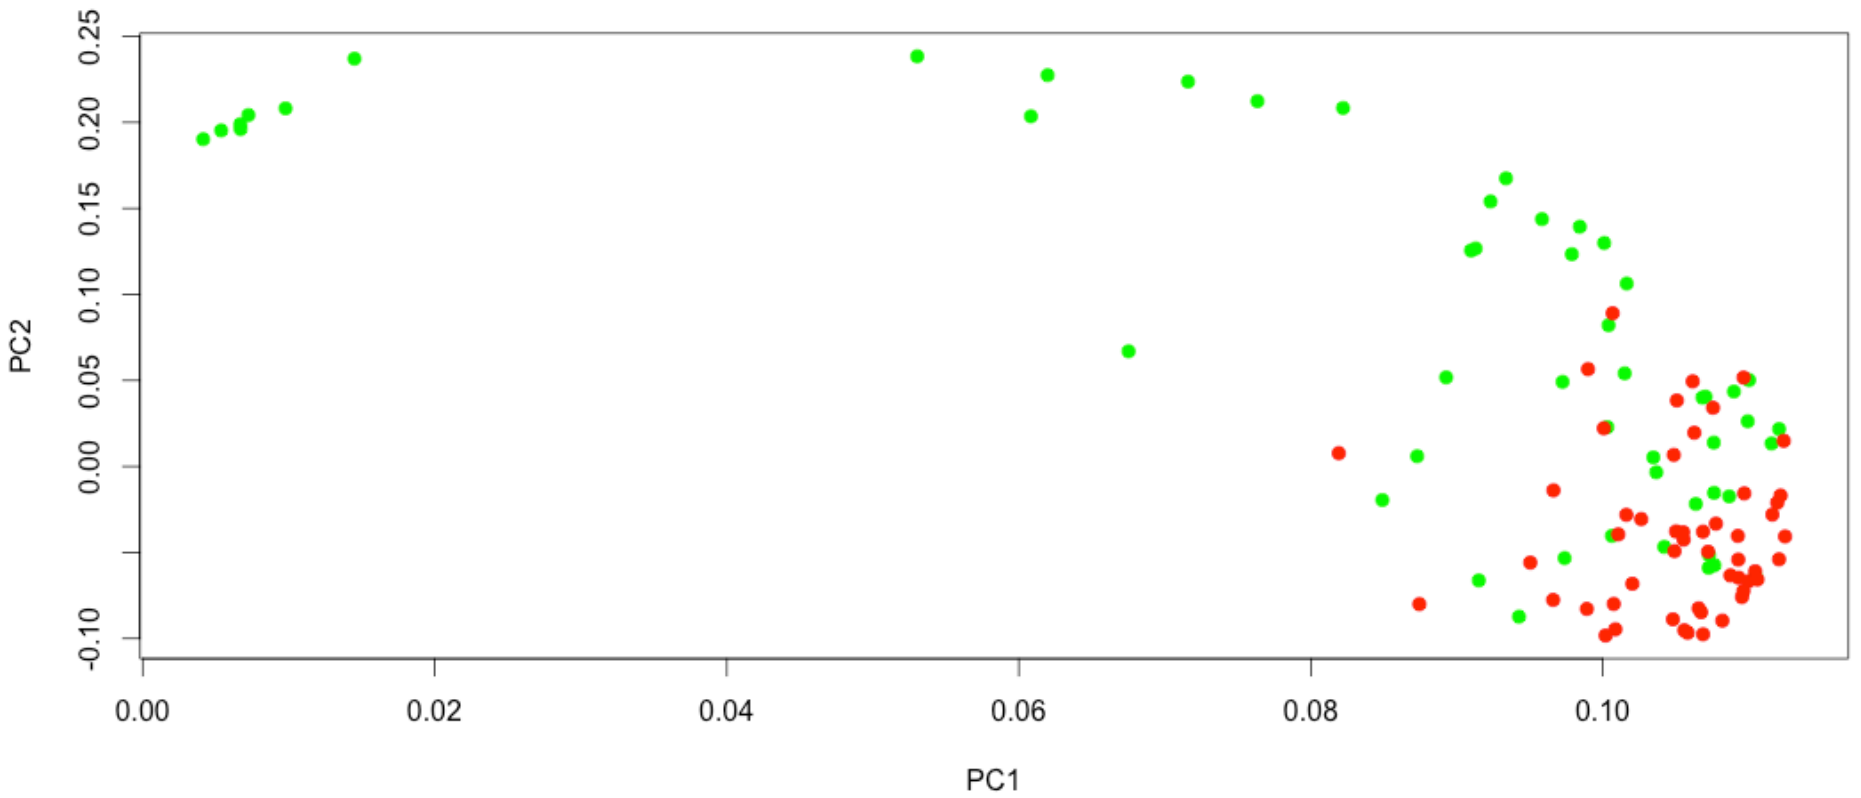

- Tumor sample
- Healthy counterpart



### Principal Component Analysis READ

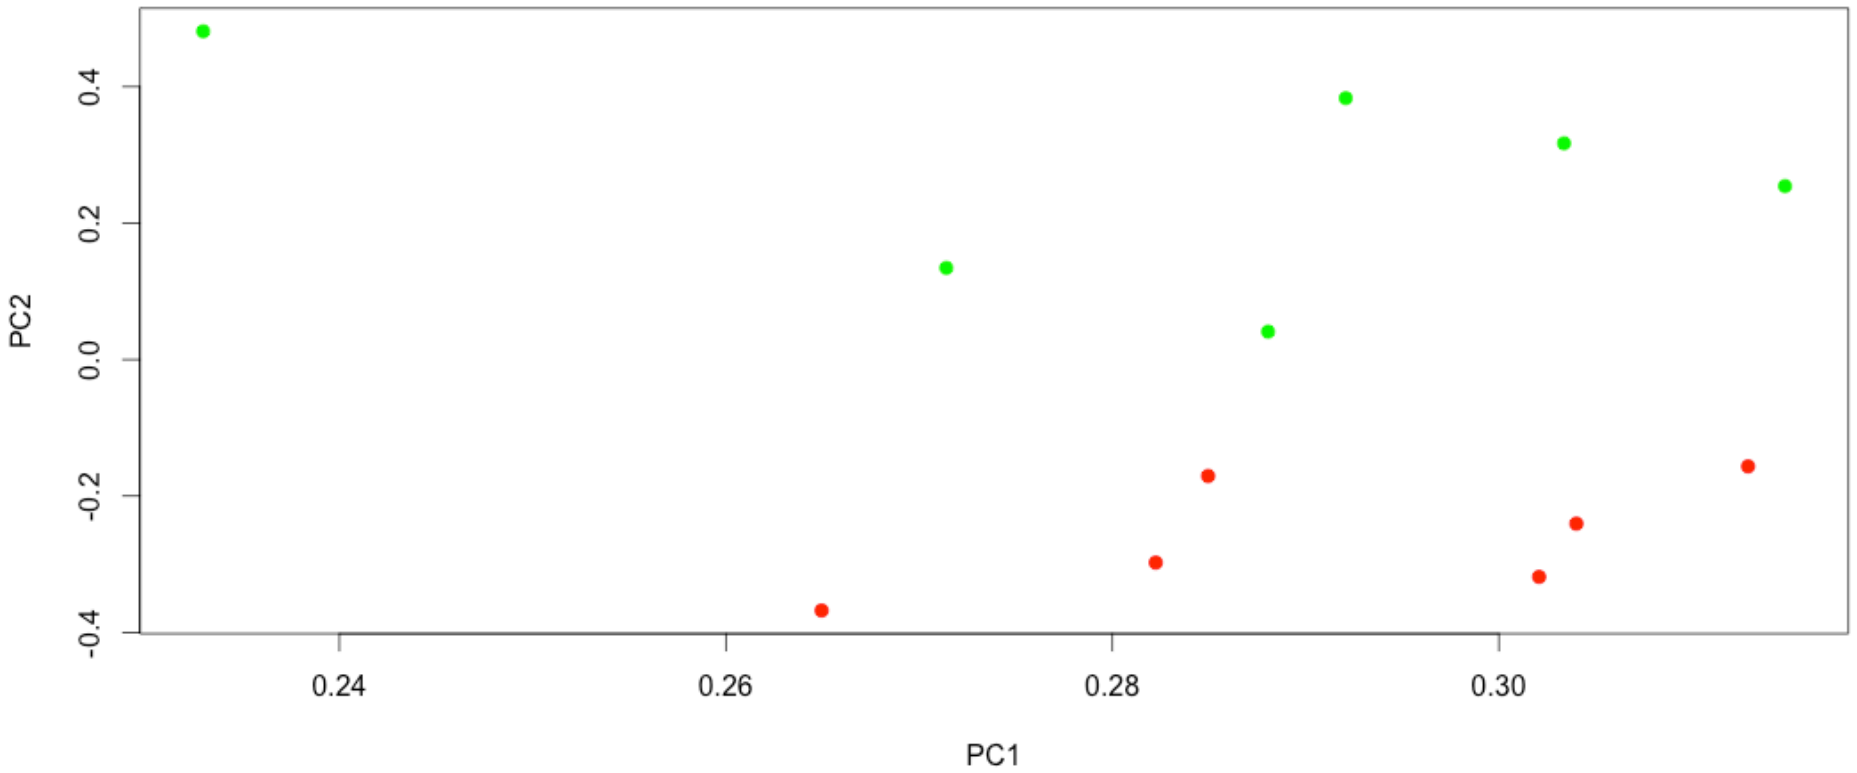

- Tumor sample
- Healthy counterpart

### Principal Component Analysis SARC

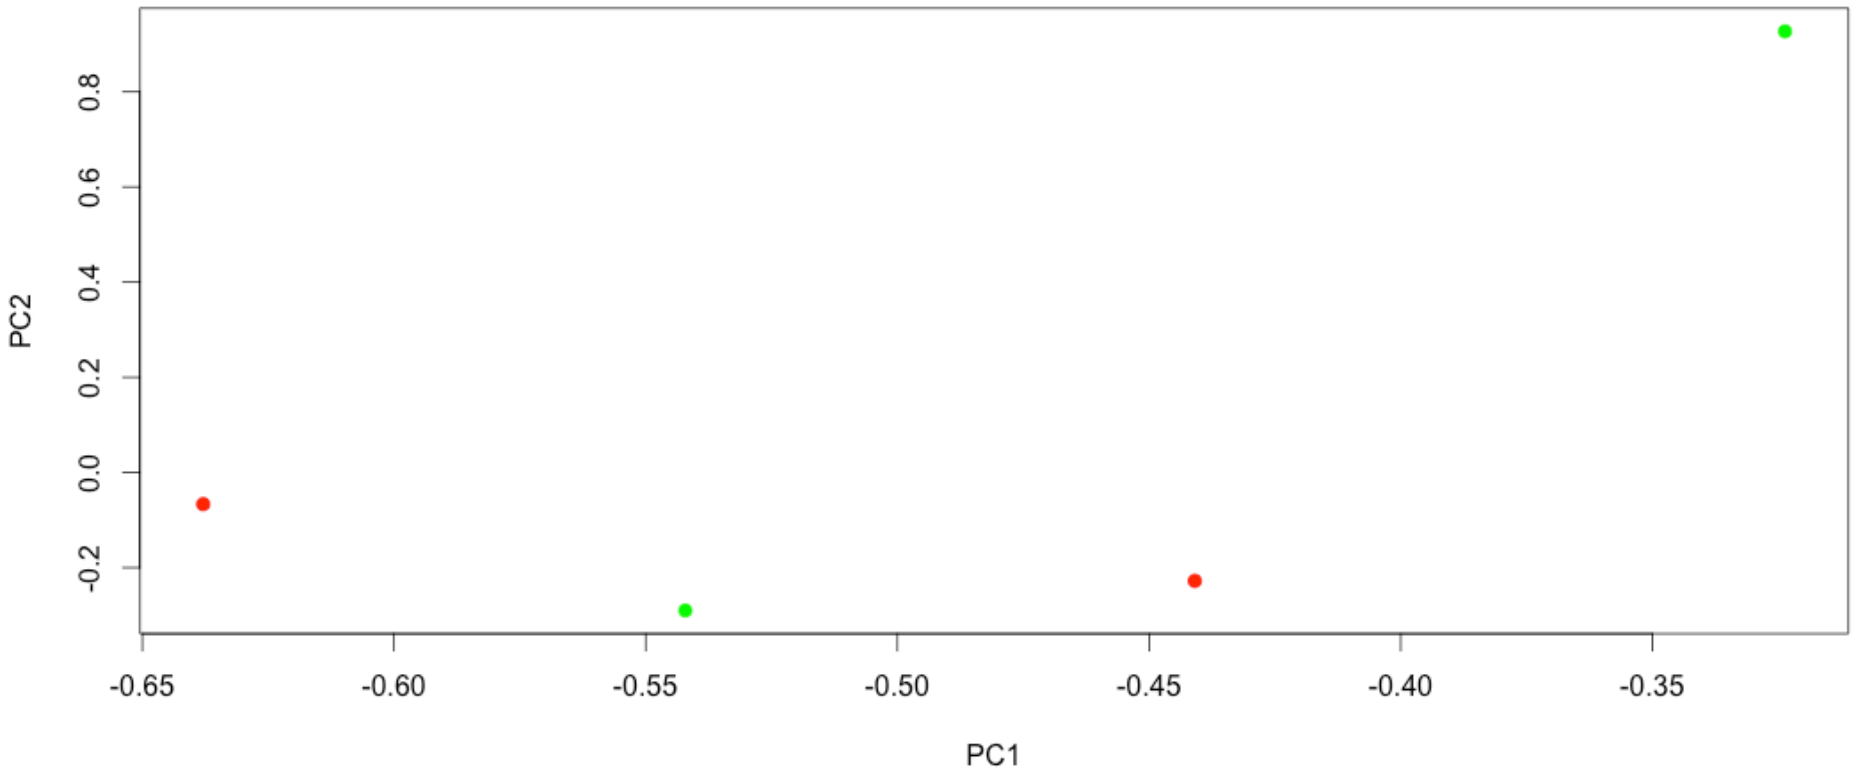

- Tumor sample
- Healthy counterpart

# Principal Component Analysis THCA

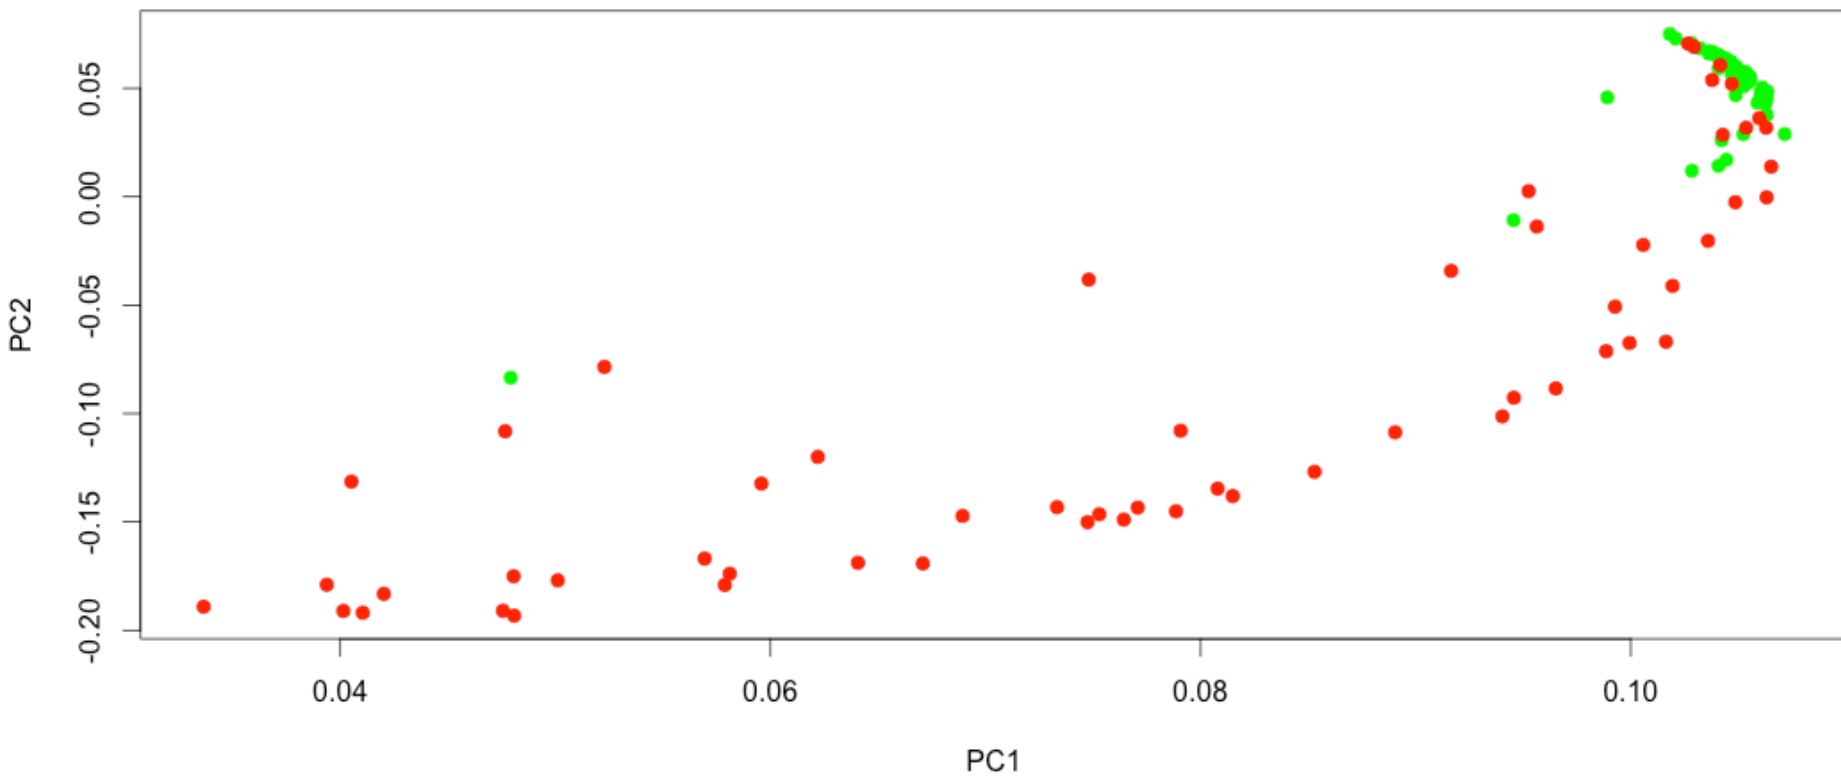

- Tumor sample
- Healthy counterpart

### Principal Component Analysis THYM

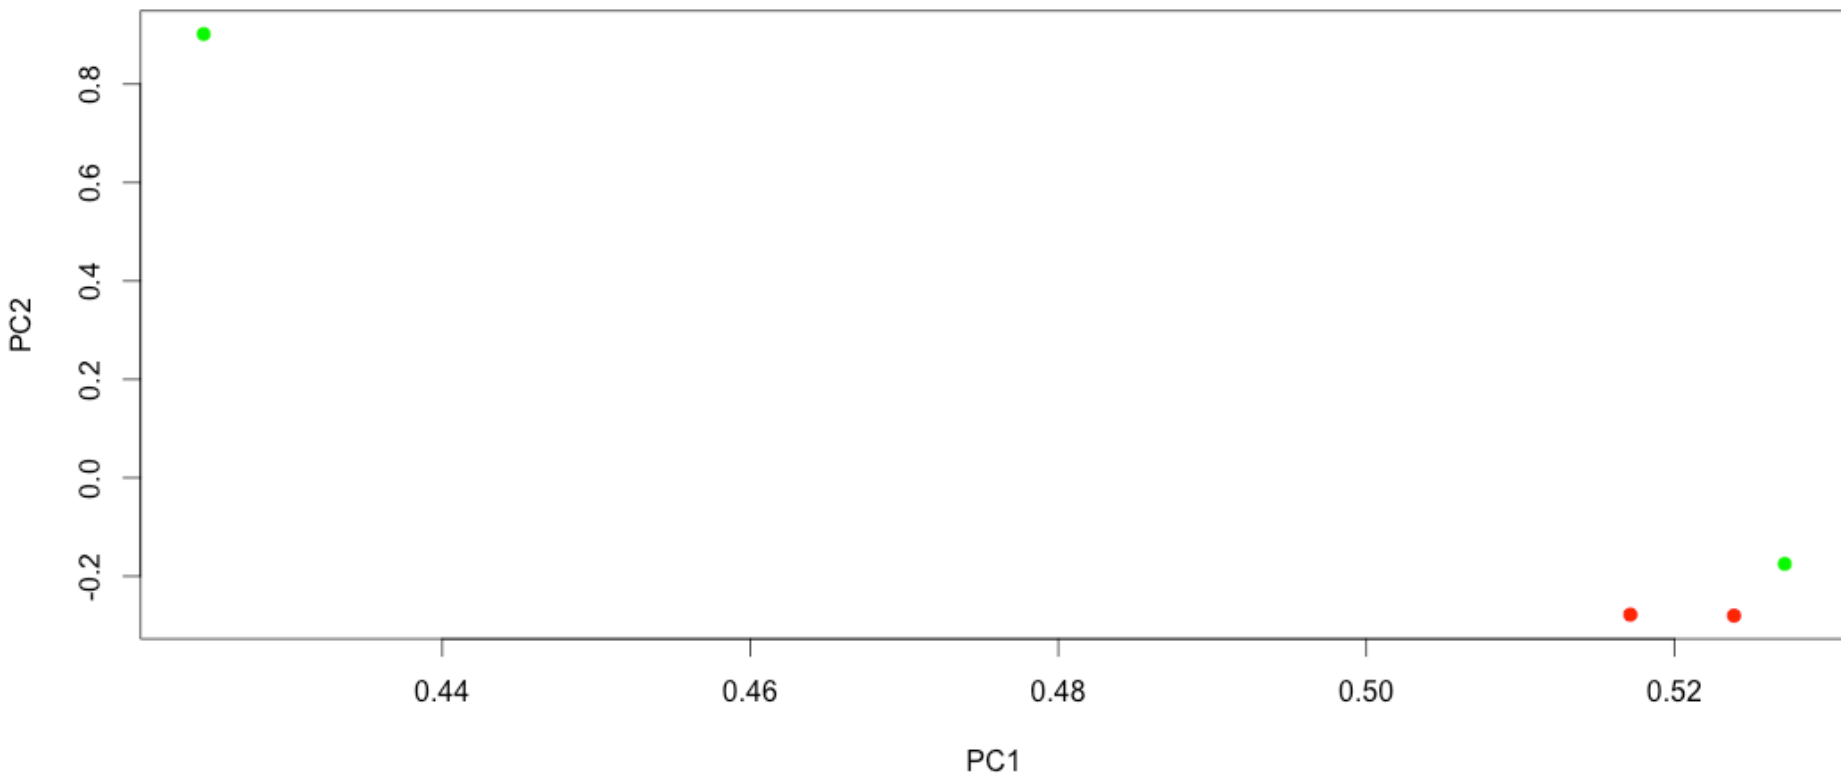

• Tumor sample

• Healthy counterpart

### Principal Component Analysis UCEC

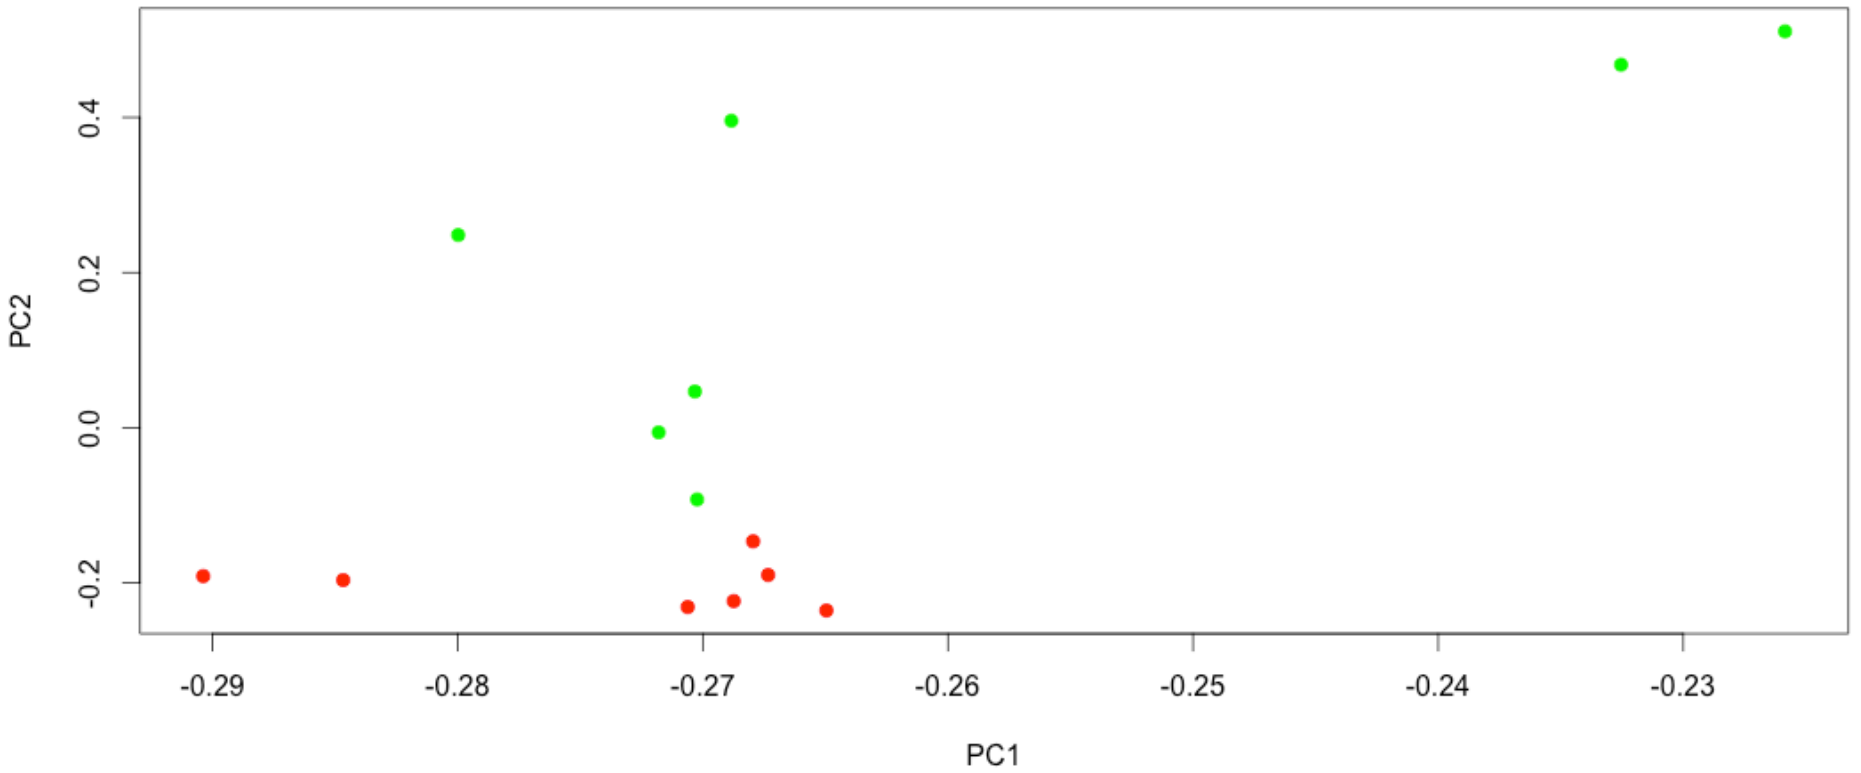

- Tumor sample
- Healthy counterpart
